# Supplementary material
Source: PubMed Central journal article supplement (PMC8559558)
Supplement: NIHMS1750865-supplement-ESI.pdf [file NIHMS1750865-supplement-ESI.pdf]

## Supplementary Information

### Phytochemical-based nanocomposites for the treatment of bacterial biofilms

Cheng-Hsuan Li,<sup>†,‡</sup> Xinhong Chen,<sup>∞,‡</sup> Ryan F. Landis,<sup>†</sup> Yingying Geng,<sup>†</sup> Jessa Marie Makabenta,<sup>†</sup> William Lemnios,<sup>†</sup> Akash Gupta,<sup>†</sup> and Vincent M. Rotello\*,<sup>†</sup>

<sup>†</sup>Department of Chemistry, University of Massachusetts Amherst, 710 North Pleasant Street, Amherst, Massachusetts 01003, United States

<sup>∞</sup>Institute of Translational Medicine, Medical College, Yangzhou University, Yangzhou, Jiangsu 225001, P. R. China.

<sup>‡</sup>C.-H. Li and XH. C contributed equally

Corresponding Author

\*E-mail: rotello@chem.umass.edu

## Table of contents

### *Figure*

|                                                                                              |        |
|----------------------------------------------------------------------------------------------|--------|
| Size distribution of nanocomposites .....                                                    | S2     |
| Antimicrobial activity of nanocomposites and phytochemicals against bacterial biofilms ..... | S2 -S4 |
| Biomass of bacterial biofilms after NCs treatment .....                                      | S5     |
| Cytotoxicity of nanocomposites to 3T3 fibroblast cells .....                                 | S5     |

### *Table*

|                                                                |    |
|----------------------------------------------------------------|----|
| MBEC <sub>90</sub> and GI <sub>50</sub> of Nanocomposites..... | S6 |
| Bacterial strains information .....                            | S6 |

## Size distribution of nanocomposites

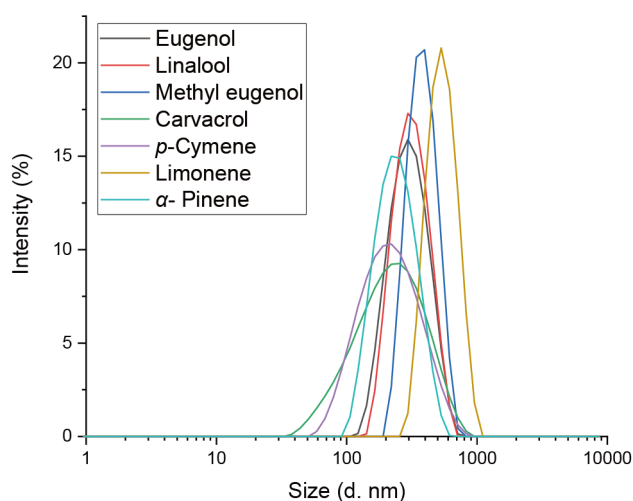

**Figure S1** Average diameters of nanocomposites loaded with different phytochemicals in phosphate buffer saline (150 mM) were determined by DLS (Malvern Zetasizer Nano ZS)

## Antimicrobial activity of nanocomposites and phytochemicals against bacterial biofilms

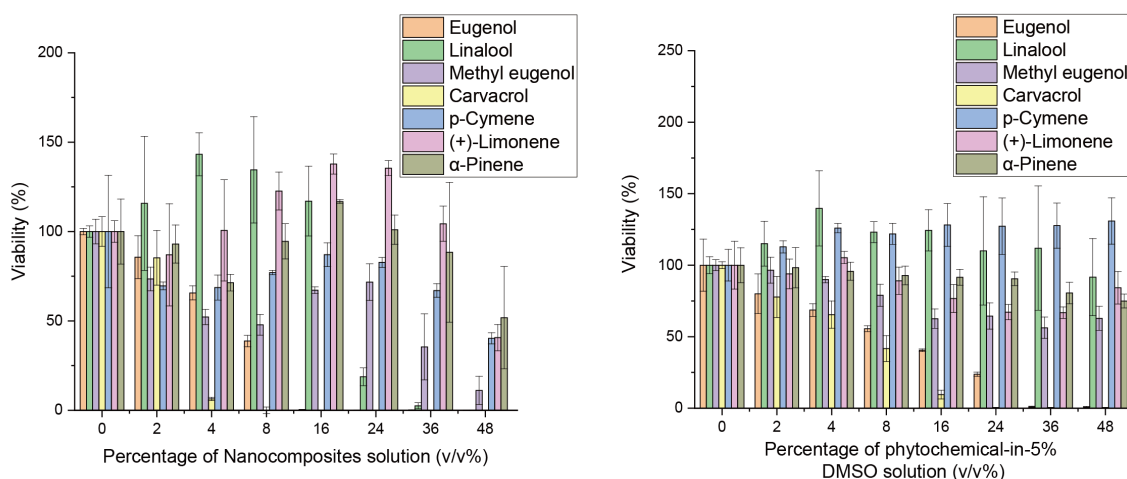

**Figure S2** Viabilities of *E. coli* (CD2) biofilms after a three-hour treatment with a) NCs or b) phytochemicals in 5 v/v% DMSO solution. Data were presented as mean  $\pm$  standard deviation and represented three independent experiments.

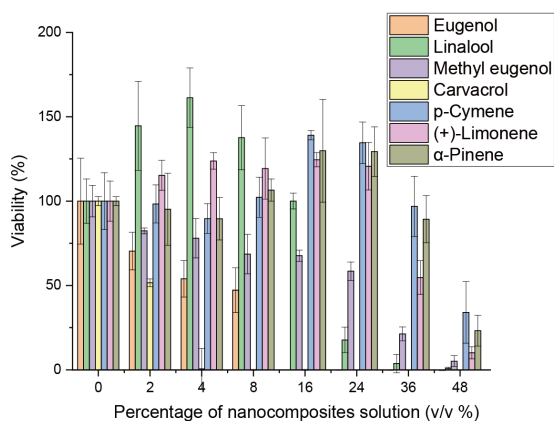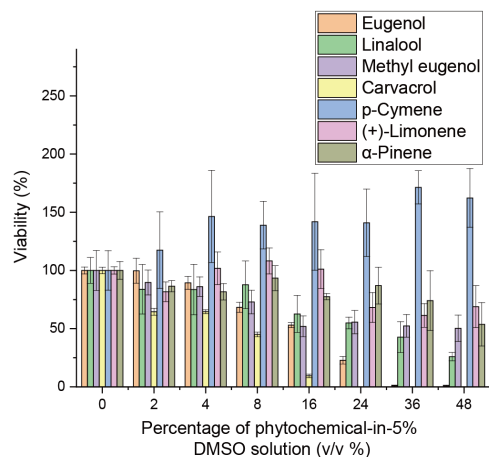

**Figure S3** Viabilities of *P. aeruginosa* (CD1006) biofilms after a three-hour treatment with a) NCs or b) phytochemicals in 5 v/v% DMSO solution. Data were presented as mean  $\pm$  standard deviation and represented three independent experiments.

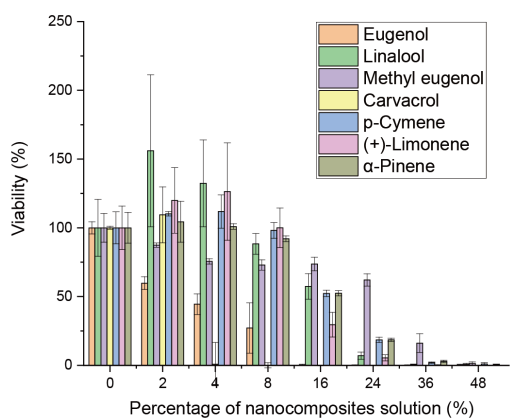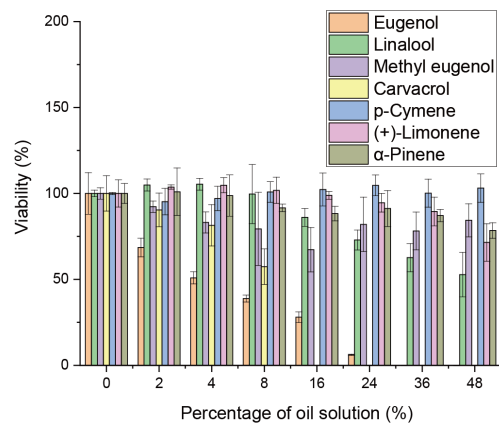

**Figure S4** Viabilities of *E. cloacae* complex (CD1412) biofilms after a three-hour treatment with a) NCs or b) phytochemicals in 5 v/v% DMSO solution. Data were presented as mean  $\pm$  standard deviation and represented three independent experiments.

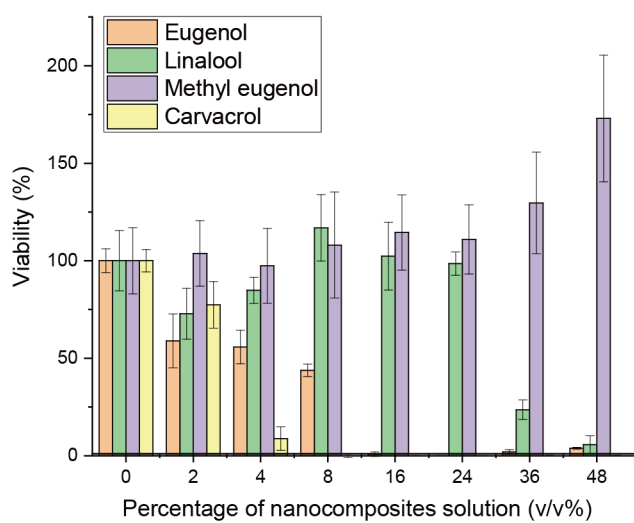

**Figure S5** Viabilities of *S. aureus* (CD489, MRSA) biofilms after a three-hour treatment with nanocomposites loaded with eugenol, linalool, methyl eugenol, or carvacrol. Data were presented as mean  $\pm$  standard deviation and represented three independent experiments.

## Biomass of bacterial biofilms after NCs treatment

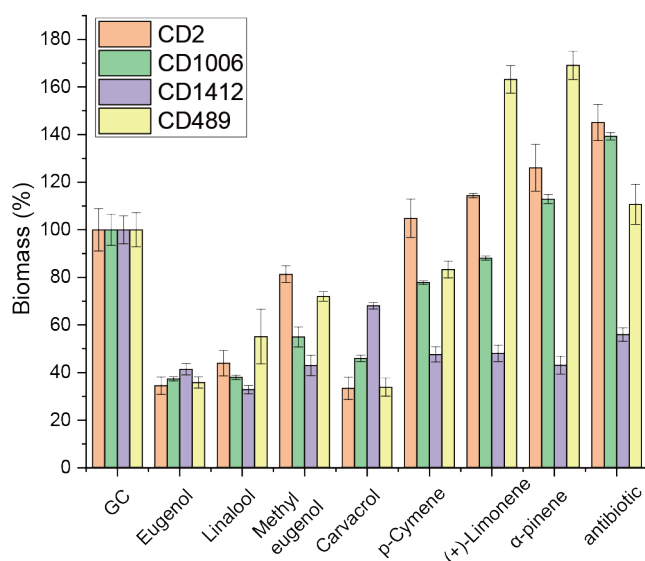

**Figure S6** Biomass of *E. coli* (CD2), *P. aeruginosa* (CD1006), *E. cloacae* complex (CD1412), and *S. aureus* (CD489) biofilms after a three-hour treatment with NCs. The concentrations were either the corresponding MBEC<sub>90</sub> of the NCs (if applicable) or 48 v/v%. Furthermore, biofilms were treated with antibiotics as controls. Specifically, Gram-negative bacterial biofilms were treated with 10 × MIC of colistin while Gram-positive biofilms were treated with 10 × MIC of vancomycin. Data were presented as mean ± standard deviation and represented three independent experiments.

## Cytotoxicity of nanocomposites to 3T3 fibroblast cells

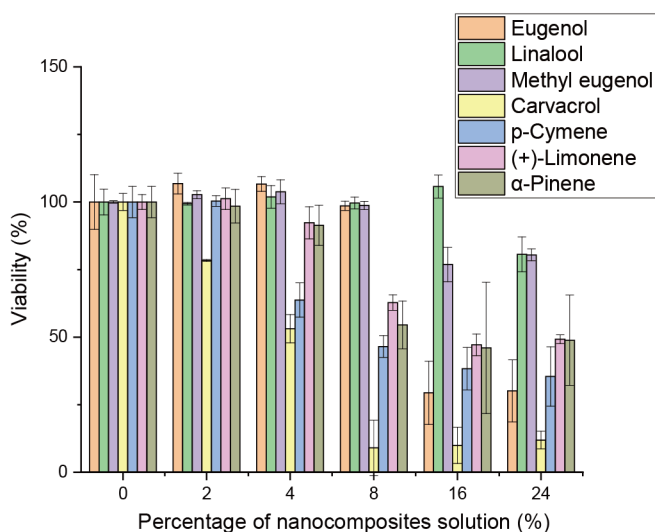

**Figure S7** Viabilities of 3T3 fibroblast cells after a three-hour treatment with NCs. The viabilities were determined using Pierce LDH cytotoxicity assay. Data were presented as mean ± standard deviation and represented three independent experiments.

## MBEC<sub>90</sub> and GI<sub>50</sub> of Nanocomposites

| Encapsulated phytochemical | MBEC <sub>90</sub> (v/v %) |                      |                           |                  | GI <sub>50</sub> (v/v %) |
|----------------------------|----------------------------|----------------------|---------------------------|------------------|--------------------------|
|                            | CD2                        | CD1006               | CD1412                    | CD489            | 3T3                      |
|                            | <i>E. coli</i>             | <i>P. aeruginosa</i> | <i>E. cloacae</i> complex | <i>S. aureus</i> | Fibroblast cell          |
| Eugenol                    | 13.8                       | 11.86                | 12.23                     | 9.27             | 8.89                     |
| Linalool                   | 25.98                      | 26.83                | 30.03                     | 37.9             | 27.14                    |
| Methyl eugenol             | nd                         | 43.21                | 39.14                     | nd               | nd                       |
| Carvacrol                  | 3.44                       | 2.96                 | 2.22                      | 3.55             | 3.9                      |
| <i>p</i> -Cymene           | nd                         | nd                   | 28.88                     | nd               | 6.62                     |
| Limonene                   | nd                         | nd                   | 21.64                     | nd               | 13.88                    |
| $\alpha$ -pinene           | nd                         | nd                   | 29.22                     | nd               | 9.83                     |

**Table S1** NCs' minimum concentration to eradicate 90% of biofilms (MBEC<sub>90</sub>) against four bacteria strains and their concentrations to inhibit 50% fibroblast cell proliferation (GI<sub>50</sub>). The abbreviation "nd" indicated not determined.

### Bacterial strain information

|                 | Riley Strain Name                | CD-2           | CD-1412                     | CD-1006              | CD-489                  |
|-----------------|----------------------------------|----------------|-----------------------------|----------------------|-------------------------|
|                 | Species                          | <i>E. coli</i> | <i>E. cloacae</i> complex   | <i>P. aeruginosa</i> | <i>S. aureus</i> - MRSA |
|                 | Date Isolated                    | 9/11/2011      | 7/12/2006                   | 4/23/2012            | 3/12/2001               |
|                 | Specimen                         | UCC            | UCC                         | UCC                  | UCS                     |
|                 | CFU/mL                           | >100,000       | >100,000                    | >100,000             | >100,000                |
|                 | Note                             |                | Urine from nephrostomy tube |                      |                         |
| Aminoglycosides | Amikacin (Amikin)                |                | S                           |                      |                         |
|                 | Gentamicin (Garamycin)           | S              | I                           | S                    | S                       |
|                 | Kanamycin High Level             |                |                             |                      |                         |
|                 | Tobramycin (Nebcin)              |                | R                           |                      |                         |
| $\beta$ -Lactam | Ampicillin (Omnipen, Polycillin) | R              |                             | S                    |                         |
|                 | Ampicillin/sulbactam (Unasyn)    | I              |                             | S                    | R                       |
|                 | Amoxicillin/CA (Augmentin)       |                |                             |                      | R                       |
|                 | Aztreonam (Zithromax)            |                |                             |                      |                         |
|                 | Oxacillin (Prostaphlin)          |                |                             |                      | R                       |
|                 | Penicillin                       |                |                             |                      | R                       |
|                 | Piperacillin (Pipracil)          |                |                             |                      |                         |
| Cephalosporin   | Ceftazidime (Fortaz, Tazicef)    |                |                             |                      |                         |
|                 | Cefaclor                         |                |                             |                      | R                       |

|                                  |                                         |   |   |   |   |
|----------------------------------|-----------------------------------------|---|---|---|---|
|                                  | (Ceclor, Ceclor CD)                     |   |   |   |   |
|                                  | <b>Ceftriaxone</b><br>(Rocephin)        | S | S | S | R |
|                                  | <b>Cefotaxime</b>                       |   |   |   | R |
|                                  | <b>Cefazolin</b><br>(Ancef, Kefzol)     | S | R | S |   |
|                                  | <b>Ceftizoxime</b>                      |   |   |   |   |
|                                  | <b>Cefepime</b> (Maxipime)              | S | S | S |   |
|                                  | <b>Cefoxitin</b> (Mefoxin)              | S | R | S |   |
|                                  | <b>Cefuroxime-Sodium</b>                |   |   |   | R |
|                                  | <b>Cefuroxime-Axetil</b><br>(Ceftin)    |   |   |   |   |
| <b>Carbapenem</b>                | <b>Ertapenem</b>                        |   |   |   |   |
|                                  | <b>Imipenem</b> (Primaxin)              |   |   | S | R |
|                                  | <b>Meropenem</b><br>(Merrem)            |   |   |   |   |
| <b>Macrolides</b>                | <b>Azithromycin</b><br>(Azactam)        |   |   |   |   |
|                                  | <b>Erythromycin</b>                     |   |   |   |   |
| <b>Fluoroquinolone</b>           | <b>Ciprofloxacin</b> (Cipro)            | S | S | S |   |
|                                  | <b>Levofloxacin</b><br>(Levaquin)       | S | S | S | R |
|                                  | <b>Ofloxacin</b> (Floxin)               |   |   |   |   |
| <b>Lincosamides</b>              | <b>Clindamycin</b><br>(Cleocin)         |   |   |   |   |
| <b>Oxazolidinones</b>            | <b>Linezolid</b> (Zyvox)                |   | S |   | S |
| <b>Antimycobacterial</b>         | <b>Rifampin</b><br>(Rifadin, Rimactane) |   |   |   | S |
| <b>Folate pathway inhibitors</b> | <b>Trimethoprim/Sulfa</b><br>(Gantanol) | S | R | S | S |
| <b>Tetracycline</b>              | <b>Tetracycline</b>                     |   |   |   | S |
| <b>Glycylcyclines</b>            | <b>Tigecycline</b>                      |   |   |   |   |
| <b>Glycopeptides</b>             | <b>Vancomycin</b><br>(Vancocin)         |   |   |   | S |

**Table S2** All strains were harvested and tested for susceptibility in Cooley Dickinson Hospital Microbiology Laboratory (Northampton, MA). S: Susceptible; I: Intermediate; R: Resistant.
